# Supplementary material for: Differential escape of neutralizing antibodies by SARS-CoV-2 Omicron and pre-emergent sarbecoviruses
Source: Res Sq. 2022 Feb 23:rs.3.rs-1362541. Preprint. [Version 1] doi: 10.21203/rs.3.rs-1362541/v1 (PMC8887082; doi:10.21203/rs.3.rs-1362541/v1)
Supplement: Supplement 3 [file 874157dea35d1a312c3466f2.docx]

**Differential escape of neutralizing antibodies by SARS-CoV-2 Omicron and pre-emergent sarbecoviruses**

Chee Wah Tan1,*, Wan Ni Chia1, Feng Zhu1, Barnaby E Young2,3,4, Napaporn Chantasrisawad5, Shi-Hsia Hwa6,7, Aileen Ying-Yan Yeoh1, Beng Lee Lim1, Wee Chee Yap1, Surinder Kaur MS Pada8, Seow Yen Tan2,10 , Watsamon Jantarabenjakul5,9, Shiwei Chen1, Jinyan Zhang1, Yun Yan Mah1, Vivian Chih-Wei Chen1, Mark I-C Chen2,3, Supaporn Wacharapluesadee5, Alex Sigal6,11,12, Opass Putcharoen5,8, David Chien Lye2,3,4,13 and Lin-Fa Wang1,*

1Programme in Emerging Infectious Diseases, Duke-NUS Medical School, Singapore

2National Center of Infectious Diseases, Singapore

3Tan Tock Seng Hospital, Singapore

4Lee Kong Chian School of Medicine, Nanyang Technological University, Singapore.

5Thai Red Cross Emerging Infectious Diseases Clinical Center, King Chulalongkorn Memorial Hospital, Bangkok, Thailand

6Africa Health Research Institute, Durban, South Africa

7Division of Infection and Immunity, University College London, London, United Kingdom

8Ng Teng Fong General Hospital, Singapore

9Faculty of Medicine, Chulalongkorn University, Bangkok, Thailand

10Changi General Hospital, Singapore

11School of Laboratory Medicine and Medical Sciences, University of KwaZulu-Natal, Durban, South Africa

12Max Planck Institute for Infection Biology, Berlin, Germany

13Yong Loo Lin School of Medicine, National University of Singapore, Singapore

*Corresponding author: Lin-Fa Wang ([linfa.wang@duke-nus.edu.sg](mailto:linfa.wang@duke-nus.edu.sg)); Chee Wah Tan ([cheewah.tan@duke-nus.edu.sg](mailto:cheewah.tan@duke-nus.edu.sg)); Programme in Emerging Infectious Diseases,

Duke-NUS Medical School, Singapore.

**Table of contents**

**Supplementary Data Fig 1.**

**Supplementary Data Fig 2**

**Supplementary Data Table 1**

**Supplementary Data Table 2**

**
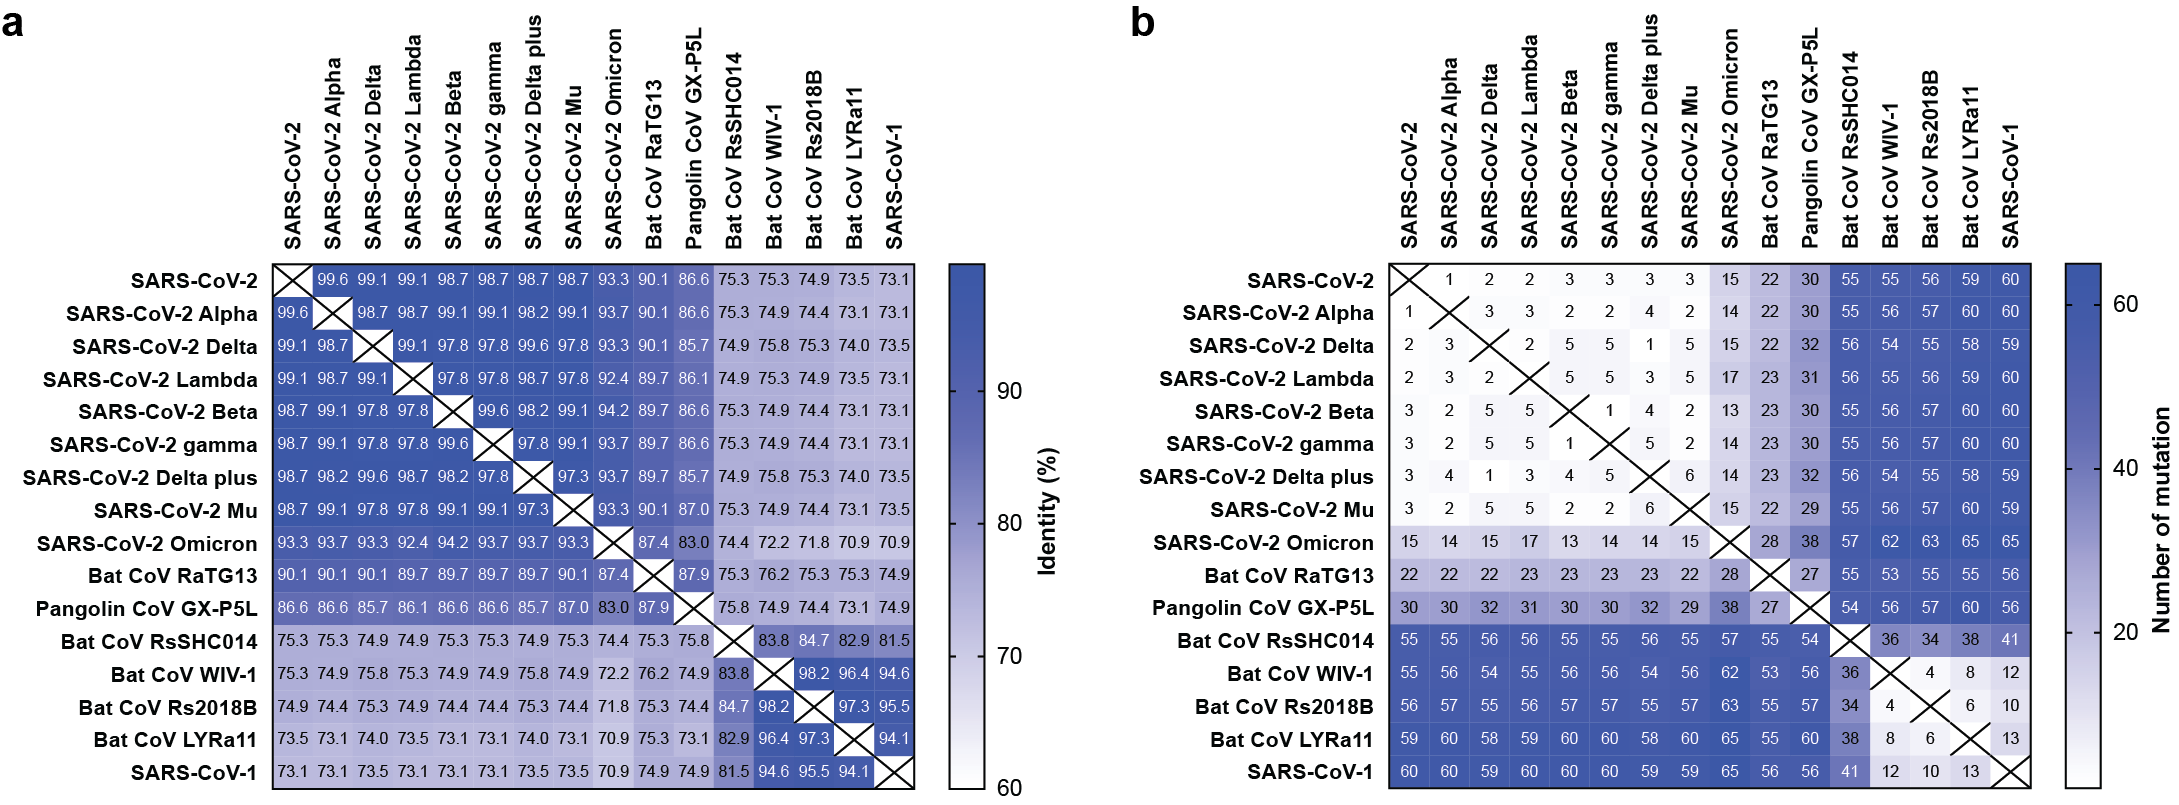
**

**Supplementary Data Fig 1. Amino acid difference between sarbecovirus RBDs.** Matrix of **(a)** amino acid identity (%) and **(b)** mutation numbers of 16 sarbecovirus RBDs used in multiplex sVNT. RBD sequences are aligned using Geneious alignment with Blosum62 model.

**
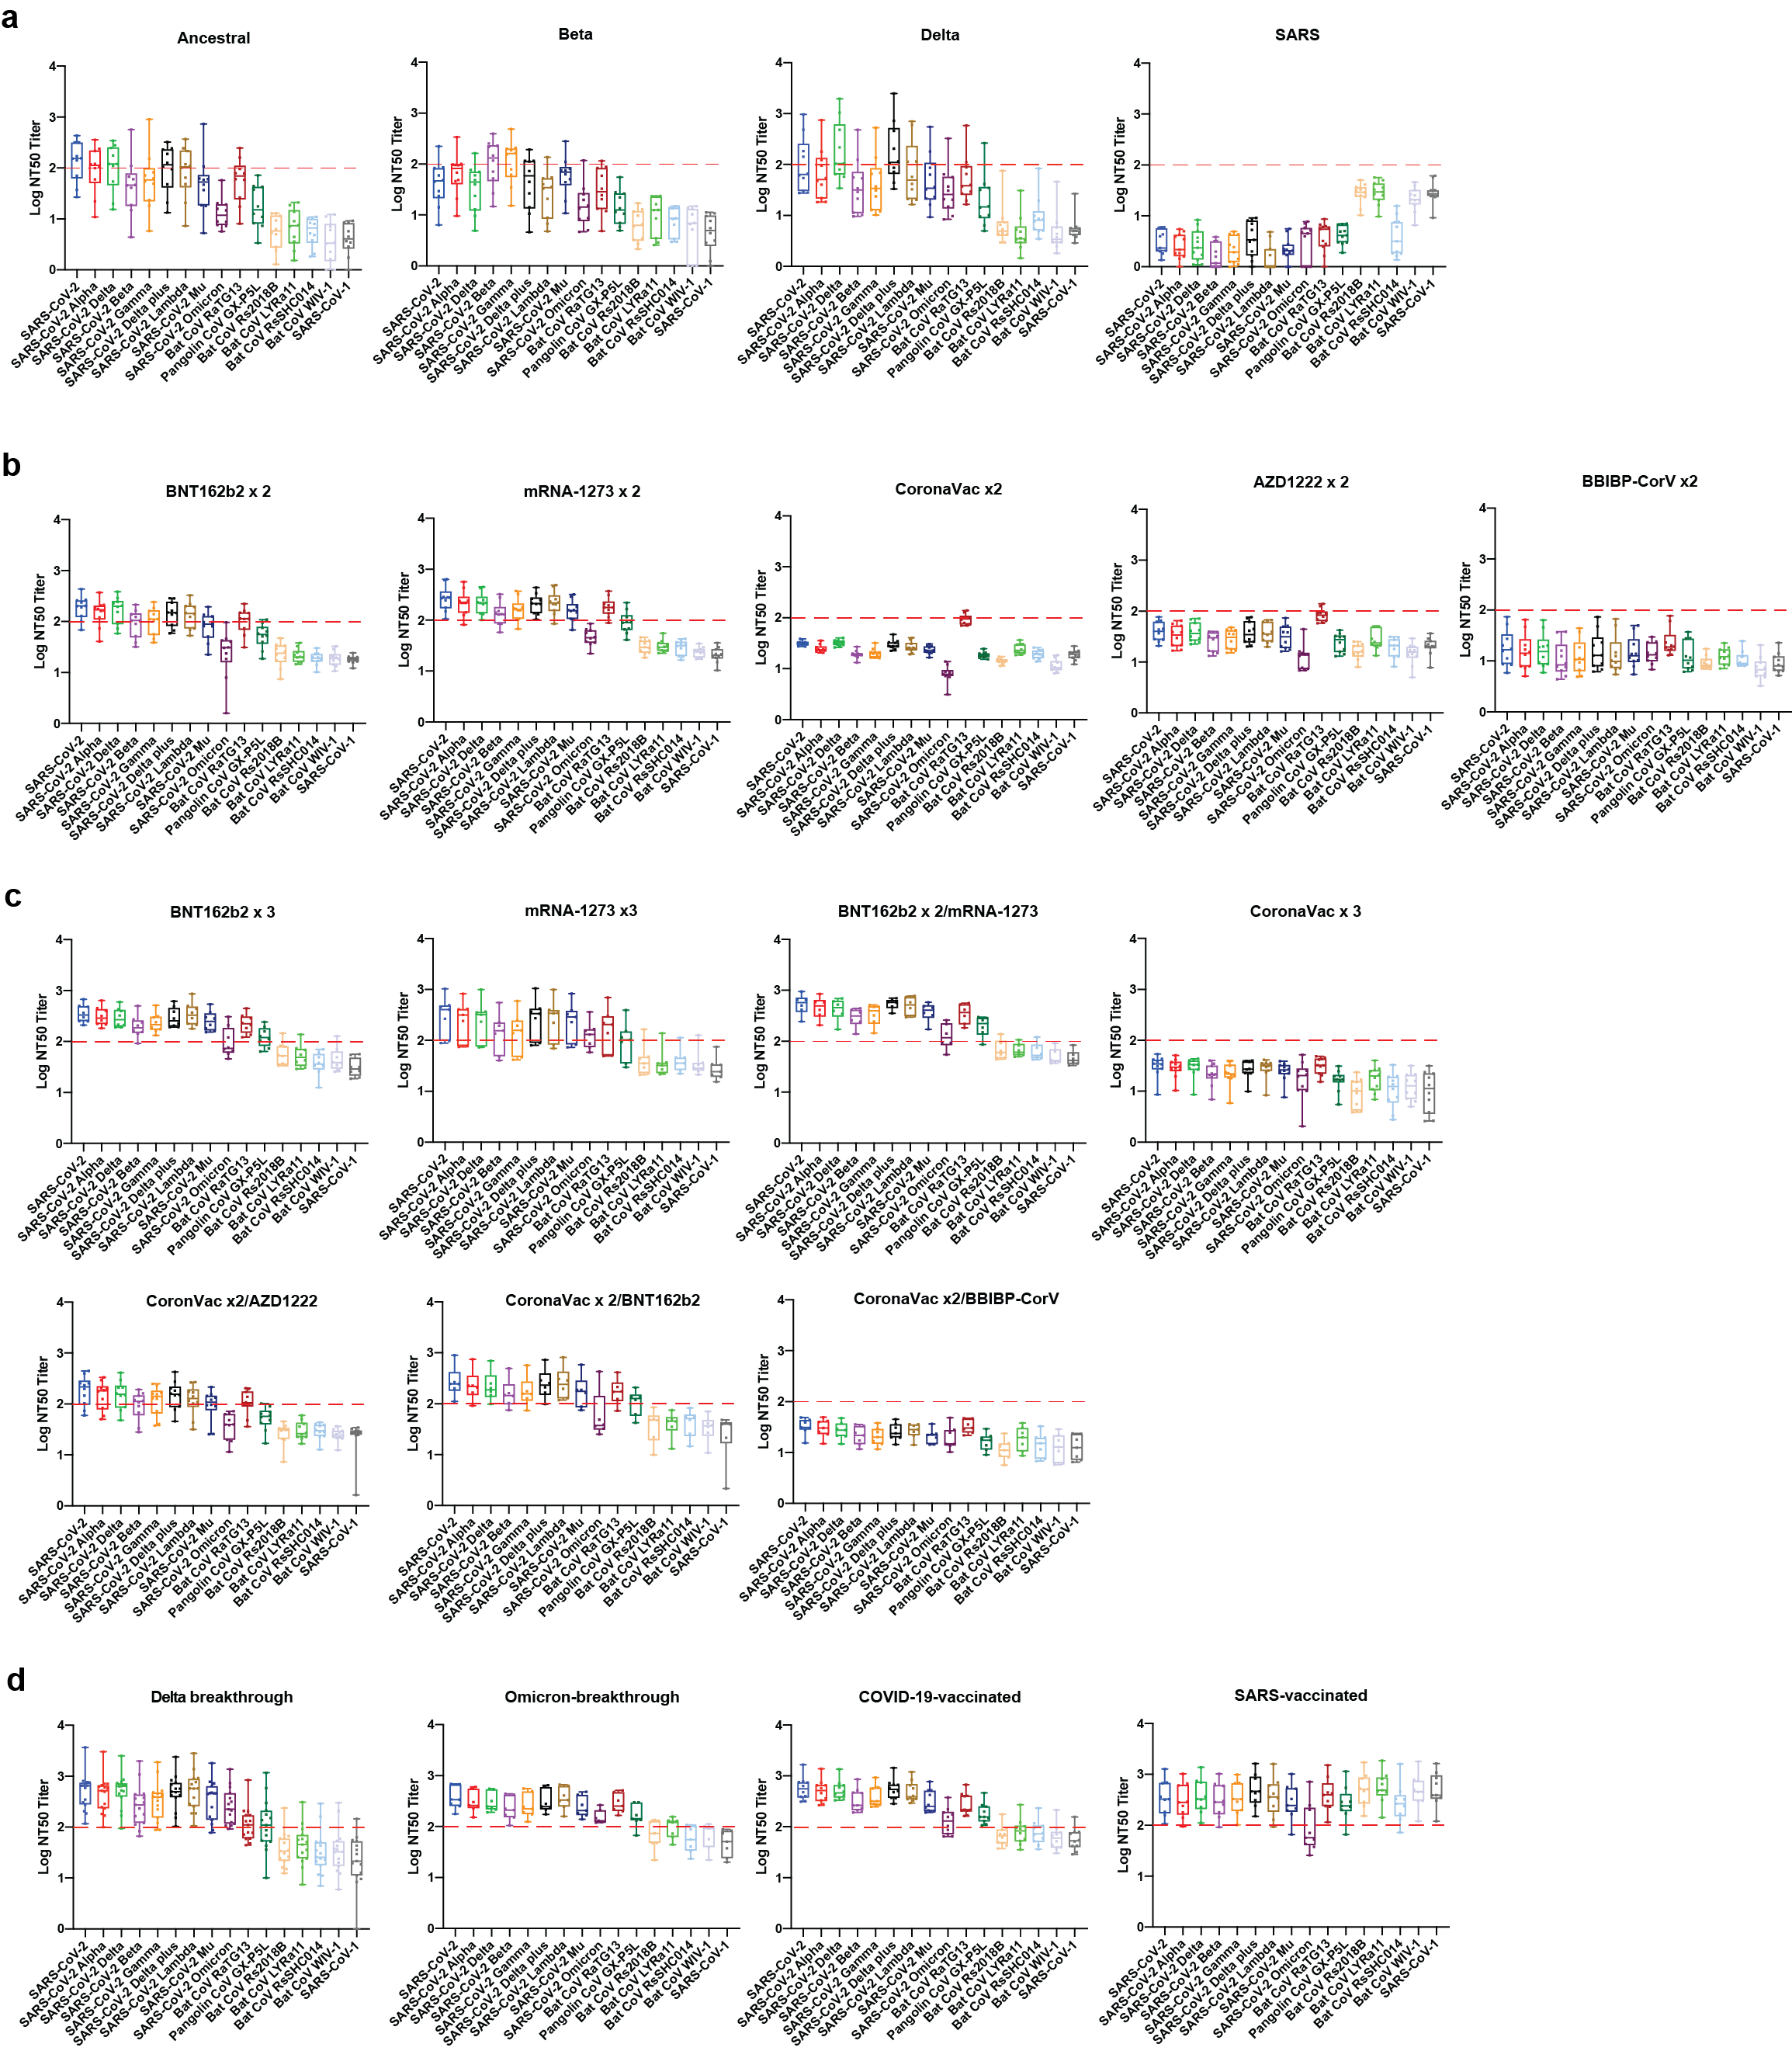
**

**Supplementary Data Fig 2. Neutralization titer 50% (NT50) of 20 serum panels determined using multiplex sVNT. (a)** Convalescent serum panels derived from SARS-CoV-2 ancestral, Beta, Delta and SARS-CoV-1 survivors. **(B)** Vaccinated serum panels derived from individuals received two doses of BNT162b2, mRNA-1273, CoronaVac, AZD1222 and BBIBP-CorV. **(C)** Boosted serum panels from individuals received homologous booster (BNT162b2 x3, mRNA-1273 x3, CoronaVac x3) and heterologous booster regime (BNT162b2 x2/mRNA-1273, CoronaVac x2/BNT162b2, CoronVac x2/AZD1222 and CoronaVac x 2/BBIBP-CorV). **(D)** Serum panels derived from individualds with hybrid immunity (SARS-vaccinated, COVID-19-vaccinated, Delta-breakthrough and Omicron-breakthrough).

**Supplementary Data Table 1. Serum panel and WHO IU/ml**

| **Group** | **Serum Panel** | **Number** | **Geometric mean inhibition (%)a** | **IU/ml** |
| --- | --- | --- | --- | --- |
| 1  (Convalescent) | Ancestral | 10 | 57.03 | 608 |
| Beta | 10 | 29.15 | 220 |
| Delta | 10 | 41.81 | 357 |
| SARS | 11 | 1.00 | 9 |
| 2  (Vaccinated) | BNT162b2 x 2 | 10 | 74.61 | 1211 |
| mRNA-1273 x 2 | 10 | 83.03 | 1884 |
| CoronVac x 2 | 10 | 24.27 | 177 |
| BBIBP-CorV x 2 | 10 | 14.87 | 105 |
| AZD1222 x 2 | 10 | 26.71 | 198 |
| BNT162b2 x 3 | 7 | 90.98 | 3526 |
| mRNA-1273 x 3 | 7 | 79.25 | 1520 |
| BNT162 x 2/mRNA-1273 | 6 | 94.18 | 5312 |
| CoronaVac x 3 | 10 | 23.64 | 172 |
| CoronaVac x 2/BBIBP-CorV | 7 | 24.60 | 180 |
| CoronaVac x 2/AZD1222 | 10 | 66.42 | 859 |
| CoronaVac x 2/BNT162b2 | 6 | 80.11 | 1592 |
| 3  (Hybrid) | Delta Breakthrough | 16 | 87.86 | 2644 |
| Omicron breakthrough | 7 | 88.98 | 2906 |
| COVID-19 vaccinated | 10 | 93.46 | 4768 |
| SARS vaccinated | 9 | 83.30 | 1914 |

aGeometric mean inhibition (%) of ancestral SARS-CoV-2 at 1:80 dilution.

**Supplementary Data Table 2. Serum panels and IRB approval.**

| **Group** | **Serum Panel** | **Number** | **IRB** |
| --- | --- | --- | --- |
| 1  (Convalescent) | Ancestral | 10 | Duke-NUS: LH-20-006EC  NHG DSRB 2012/00917 |
| Beta | 10 | University of KwaZulu–Natal BREC/00001275/2020 |
| Delta | 10 | Duke-NUS: LH-20-006EC  NHG DSRB 2012/00917  Faculty of Medicine, Chulalongkorn University, Bangkok, Thailand IRB no 291/63 |
| SARS | 11 | Duke-NUS: LH-20-006EC  NHG DSRB E 2020/00091 |
| 2  (Vaccinated) | BNT162b2 x 2 | 10 | NUS-IRB-2021-108 |
| mRNA-1273 x 2 | 10 | NUS-IRB-2021-108 |
| CoronVac x 2 | 10 | Faculty of Medicine, Chulalongkorn University, Bangkok, Thailand IRB no 170/64 |
| BBIBP-CorV x 2 | 10 | NUS-IRB-2021-108 |
| AZD1222 x 2 | 10 | Faculty of Medicine, Chulalongkorn University, Bangkok, Thailand IRB no 170/64 |
| BNT162b2 x 3 | 7 | NUS-IRB-2021-108 |
| mRNA-1273 x 3 | 7 | NUS-IRB-2021-108 |
| BNT162 x 2/mRNA-1273 | 6 | NUS-IRB-2021-108 |
| CoronaVac x 3 | 10 | NUS-IRB-2021-108 |
| CoronaVac x 2/BBIBP-CorV | 7 | NUS-IRB-2021-108 |
| CoronaVac x 2/AZD1222 | 10 | Faculty of Medicine, Chulalongkorn University, Bangkok, Thailand IRB no 170/64 |
| CoronaVac x 2/BNT162b2 | 6 | NUS-IRB-2021-108 |
| 3  (Hybrid) | Delta Breakthrough | 16 | Duke-NUS: LH-20-006EC  NHG DSRB 2012/00917 |
| Omicron breakthrough | 7 | Duke-NUS: LH-20-006EC  NHG DSRB 2012/00917 |
| COVID-19 vaccinated | 10 | Duke-NUS: NUS-IRB-2021-840 |
| SARS vaccinated | 9 | Duke-NUS: LH-20-006EC  Duke-NUS: NUS-IRB-2021-840 |
